# Supplementary material for: Association of rurality and identifying as black with receipt of specialty care among patients hospitalized with a diabetic foot ulcer: a Medicare cohort study
Source: HighWire-hosted journal article supplement (doi:10.1136/bmjdrc-2022-003185), 2023-04-01
Supplement: bmjdrc-2022-003185supp001_data_supplement.pdf [file bmjdrc-2022-003185supp001_data_supplement.pdf]

**Appendix A.****Supplemental 1.****Table S1.** Medical Specialty Codes/Provider Taxonomy Codes Used to Identify Specialists in the Medicare Dataset

| Specialty          | Medical Specialty codes | Provider Taxonomy codes                                                                        |
|--------------------|-------------------------|------------------------------------------------------------------------------------------------|
| Endocrinology      | 11                      | 207RE0101X                                                                                     |
| Infectious disease | 11, 44                  | 207RI0200X                                                                                     |
| Orthopedic surgery | 2, 20                   | 207X00000X, 207XS0114X, 207XX0004X, 207XS0117X, 207XX0801X, 207XP3100X, 207XX005X, 207XS0106X  |
| Plastic surgery    | 2, 24                   | 2086S0122X, 2082S0099X, 2082S0105X, 208200000X                                                 |
| Podiatry           | 48                      | 213E00000X, 213ES0103X, 213ES0131X, 213EG0000X, 213EP1101X, 213EP0504X, 213ER0200X, 213ES0000X |
| Vascular surgery   | 2, 77                   | 2086S0129X                                                                                     |

**Supplemental 2. Sensitivity Analysis of alternative rurality coding scheme.****Table S2.** Alternative RUCA categorization scheme

| Category             | RUCA codes                                                                                | Number of patients per code | Number discharged from critical access hospital (%) |
|----------------------|-------------------------------------------------------------------------------------------|-----------------------------|-----------------------------------------------------|
| Urban                | 1.0, 1.1, 2.0, 2.1, 3.0, 4.1, 5.1, 7.1, 8.1, 10.1                                         | 105 245                     | 1040 (0.99)                                         |
| Large Rural          | 4.0, 4.2, 5.0, 5.2, 6.0, 6.1                                                              | 9596                        | 359 (3.74)                                          |
| Small Rural/isolated | 7.0, 7.2, 7.3, 7.4, 8.0, 8.2, 8.3, 8.4, 9.0, 9.1, 9.2, 10.0, 10.2, 10.3, 10.4, 10.5, 10.6 | 9112                        | 1334 (14.64)                                        |

**Table S3.** Observed primary and secondary outcomes by alternative RUCA categorization scheme

| Characteristic                                     | Full cohort*<br>(n=124 487)<br>(100%) | Rurality                                  |                                    |                                                |
|----------------------------------------------------|---------------------------------------|-------------------------------------------|------------------------------------|------------------------------------------------|
|                                                    |                                       | Urban patients<br>(n=105 245)<br>(84.54%) | Large Rural<br>(n=9596)<br>(7.71%) | Small<br>Rural/isolated<br>(n=9112)<br>(7.32%) |
| Outcome                                            |                                       |                                           |                                    |                                                |
| Seen by at least 1 specialist<br>(primary outcome) | 40 027 (32.15)                        | 34 574 (32.85)                            | 2671 (27.83)                       | 2699 (29.62)                                   |

**Table S4.** Odds ratios for specialty care using alternative RUCA scheme

| Outcome |                                                                                                                                                                     | At least one specialist, * aOR (95% CI) |                      |
|---------|---------------------------------------------------------------------------------------------------------------------------------------------------------------------|-----------------------------------------|----------------------|
|         |                                                                                                                                                                     | Patient characteristic                  |                      |
| Model   | Model variables                                                                                                                                                     | Small rural/isolated residence          | Identifying as Black |
| 1       | Patient characteristic                                                                                                                                              | 0.86 (0.82-0.90)                        | 1.08 (1.04-1.11)     |
| 2       | Patient characteristic+ age + sex                                                                                                                                   | 0.85 (0.81-0.89)                        | 1.03 (0.99-1.07)     |
| 3       | Rural residence + identifying as Black + age + sex + sociodemographic factors <sup>†</sup>                                                                          | 0.89 (0.85-0.94)                        | 1.04 (1.01-1.08)     |
| 4       | Rural residence + identifying as Black + age + sex + sociodemographic factors <sup>†</sup> + comorbidities + ulcer severity                                         | 0.85 (0.81-0.90)                        | 0.92 (0.89-0.97)     |
| 5       | Rural residence + age + sex identifying as Black + sociodemographic factors + comorbidities + ulcer severity + interaction (rural residence x identifying as Black) | White                                   | Black                |
|         |                                                                                                                                                                     | 0.87 (0.80-0.89)                        | 0.61 (0.51-0.74)     |
